# Supplementary material for: Enzyme stability in polymer hydrogel–enzyme hybrid nanocarrier containing phosphorylcholine group
Source: Royal Society of Chemistry journal article supplement (doi:10.1039/d4ra02436b), 2024-01-01
Supplement: d4ra02436b1.pdf [file d4ra02436b1.pdf]

## Supporting Information

### Enzyme stability in polymer hydrogel-enzyme hybrid nanocarrier containing phosphorylcholine group

Xuejin Huang,<sup>a</sup> Jincal Li,<sup>a</sup> Yasuyuki Araki,<sup>b</sup> Takehiko Wada,<sup>b</sup> Yan Xu,<sup>c</sup> Madoka Takai<sup>a</sup>

<sup>a</sup> Department of Bioengineering, School of Engineering, The University of Tokyo, 7-3-1, Hongo, Bunkyo-ku, 113-8656, Tokyo, Japan.

<sup>b</sup> Institute of Multidisciplinary Research for Advanced Materials, Tohoku University, Sendai, Japan

<sup>c</sup> Department of Chemical Engineering, Graduate School of Engineering, Osaka Metropolitan University, Sakai, Osaka, Japan.

#### List of Figures and Tables

**Fig S1.** Schematic illustration of the synthesis of PMS via RAFT polymerization

**Fig S2.** <sup>1</sup>H NMR of hydrolyzed PMS in D<sub>2</sub>O

**Table S1.** Characterization of the synthesized PMS

**Fig S3.** Size of PMS with different polymerization degrees after centrifugation.

**Fig S4.** (a) Size of BNG synthesized by one-pot method; (b) comparison of the BNG activity synthesized by different methods.

**Fig S5.** FE-SEM images of hybrid nanogels DNG and BNG

**Fig S6.** The calibration curve shows the relationship between the fluorescence intensity and the concentration of resorufin

**Fig S7.** (a) Illustration of the denaturation of  $\beta$ -gal immobilized inside zwitterionic nanogels caused by guanidinium chloride; (b) Residual activity of  $\beta$ -gal, BNG and DNG incubated with 6M guanidinium chloride for 30 min.

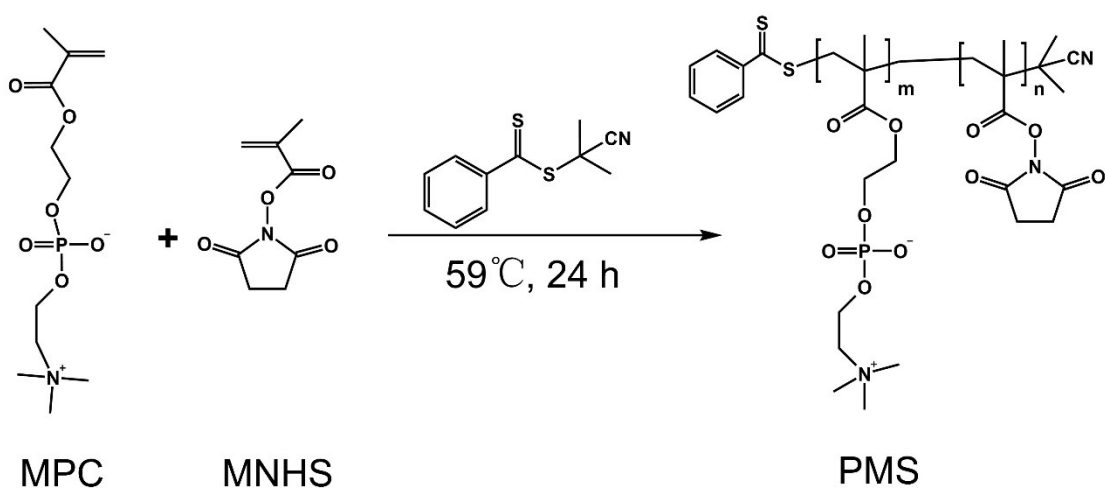

**Fig S1.** Schematic illustration of the synthesis of PMS via RAFT polymerization

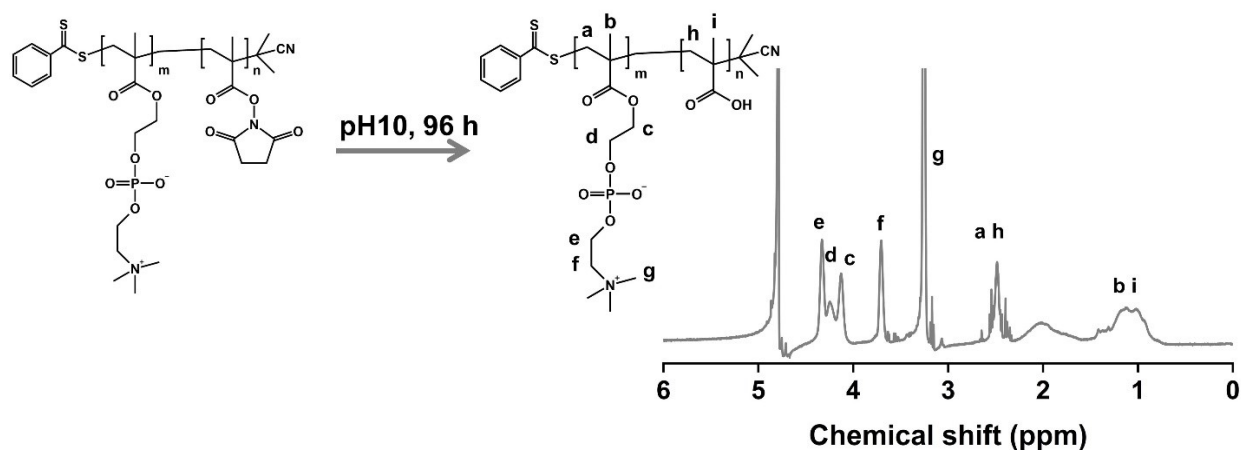

**Fig S2.**  $^1\text{H}$  NMR of hydrolyzed PMS in  $\text{D}_2\text{O}$ .  $\delta$  H (400 MHz,  $\text{D}_2\text{O}$ ) 4.33 (2H), 4.25 (2H), 4.13(2H), 3.70 (2H), 3.26 (9H), 2.49 (2H), 2.40 (2H), 1.13 (3H), 1.02 (3H).

**Table S1.** Characterization of the synthesized PMS

|     | Molar ratio in feed | Molar ratio in precursor <sup>a</sup> | $M_n$ <sup>b</sup> | $M_w/M_n$ <sup>b</sup> |
|-----|---------------------|---------------------------------------|--------------------|------------------------|
|     | MPC/MNHS            | MPC/MNHS                              |                    |                        |
| PMS | 50/50               | 57/43                                 | 12200              | 1.37                   |

a. Determined by  $^1\text{H}$  NMR in  $\text{D}_2\text{O}$

b. Detected by GPC

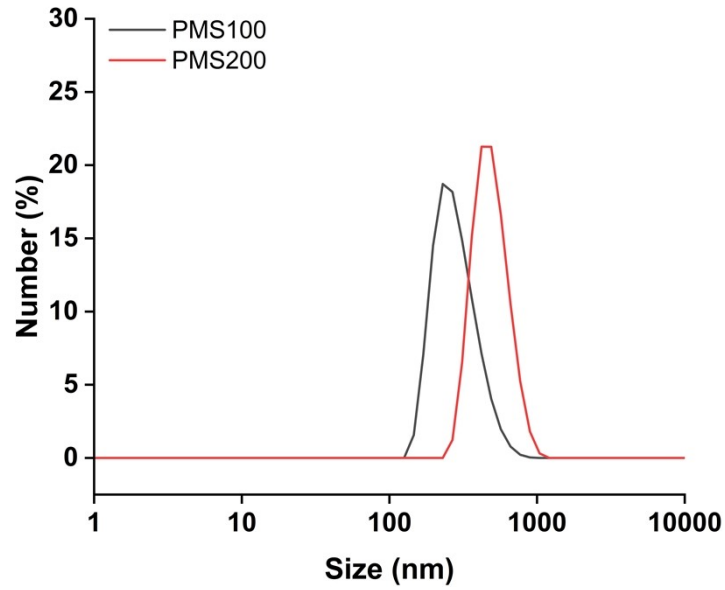

**Fig S3.** Size of PMS with different polymerization degrees after centrifugation (PMS100 and PMS200 mean their polymerization degree are 100 and 200, respectively).

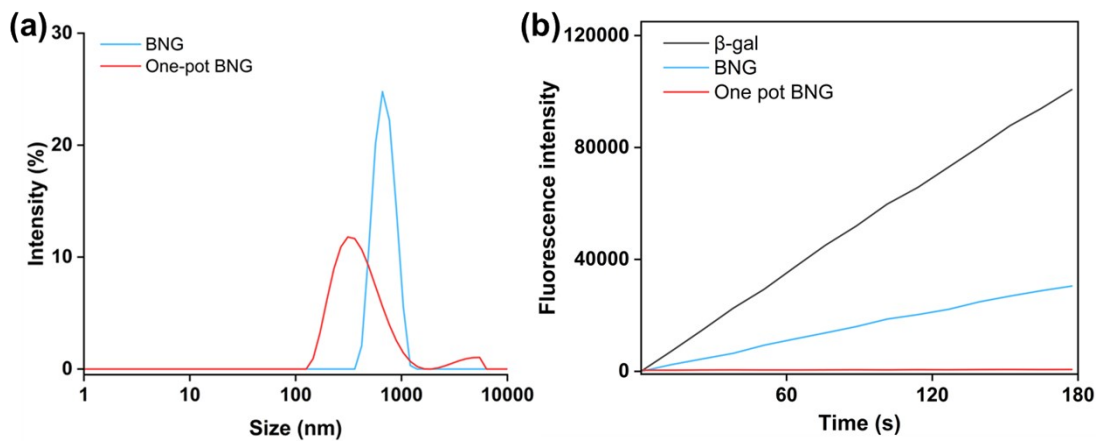

**Fig S4.** (a) Size of BNG synthesized by one-pot method; (b) comparison of the BNG activity synthesized by different methods.

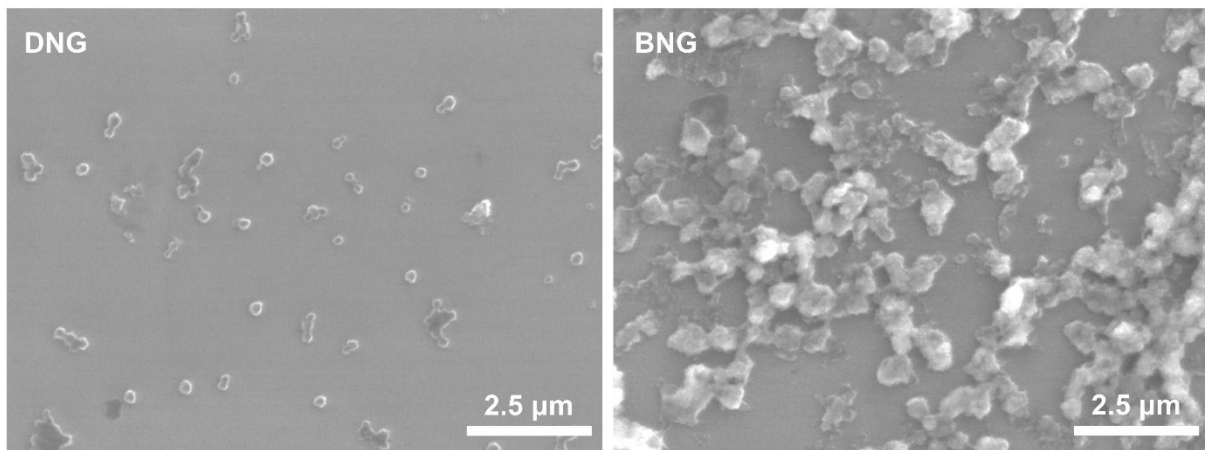

**Fig S5.** FE-SEM images of hybrid nanogels DNG and BNG.

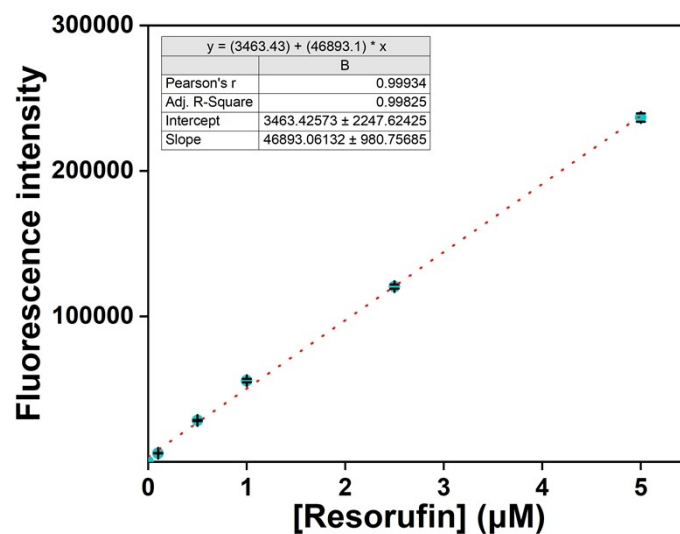

**Fig S6.** The calibration curve shows the relationship between the fluorescence intensity and the concentration of resorufin.

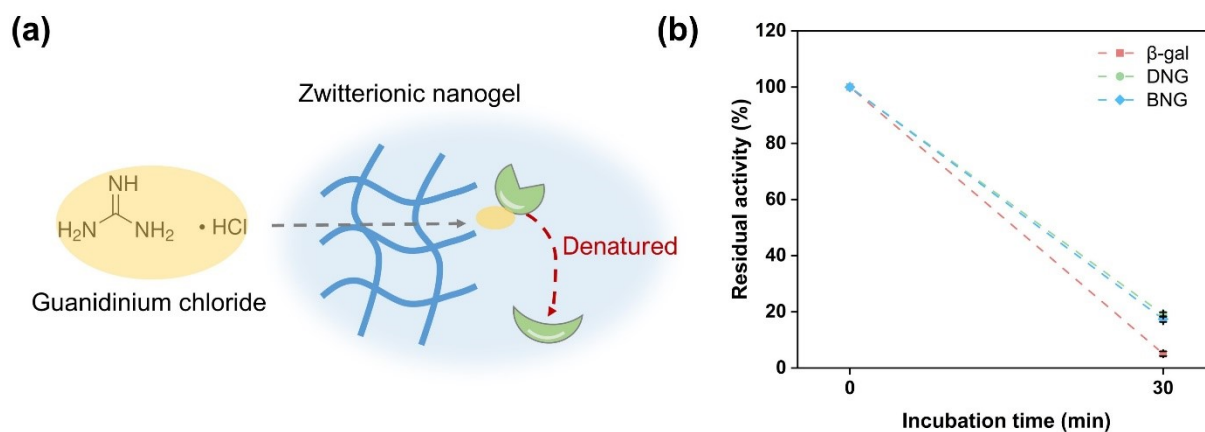

**Fig S7.** (a) Illustration of the denaturation of  $\beta$ -gal immobilized inside zwitterionic nanogels caused by guanidinium chloride; (b) Residual activity of  $\beta$ -gal, BNG and DNG incubated with 6M guanidinium chloride for 30 min.
